# Supplementary material for: Diurnal Fe(II)/Fe(III) cycling and enhanced O2 production in a simulated Archean marine oxygen oasis
Source: PubMed Central journal article supplement (PMC8024245; doi:10.1038/s41467-021-22258-1), 2021-04-06
Supplement: 41467_2021_22258_MOESM1_ESM.pdf [file 41467_2021_22258_MOESM1_ESM.pdf]

## Supplementary information

### **Diurnal Fe(II)/Fe(III) cycling and enhanced O<sub>2</sub> production in a simulated Archean marine oxygen oasis.**

Herrmann A.J.<sup>1</sup>, Sorwat J.<sup>2</sup>, Byrne J.M.<sup>2</sup>, Frankenberg-Dinkel, N. <sup>1</sup> and Gehring M.M.<sup>1\*</sup>

<sup>1</sup>Department of Microbiology, Technische Universität Kaiserslautern, 67663 Kaiserslautern, Germany

<sup>2</sup>Geomicrobiology, Centre for Applied Geosciences, University of Tübingen, 72074 Tübingen, Germany

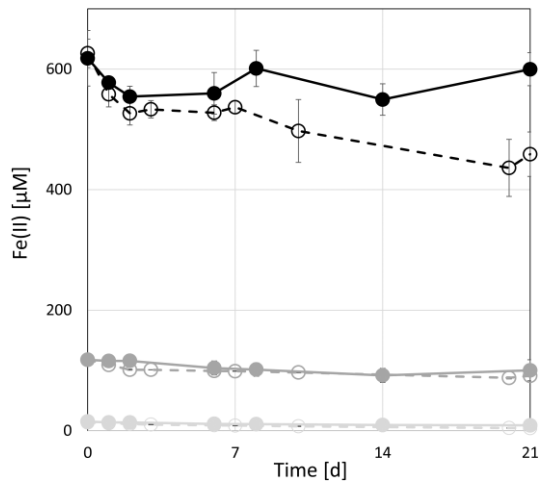

**Supplementary Fig. 1:** Ferrozine assay results of control media. Fe(II) levels in anoxic control media, buffered with 22 mM  $\text{NaHCO}_3$ , and amended with Fe(II), was determined by ferrozine assay every two to three days for 21 days in closed anoxic culture bottles (solid lines) or open cell suspension flasks in an anoxic workstation (dashed lines). The Fe(II) starting concentrations were 20  $\mu\text{M}$  (light grey), 120  $\mu\text{M}$  (medium grey) and 600  $\mu\text{M}$  (black). Data are presented as mean values  $\pm$  SD with  $n = 4$  biologically independent samples.

**Supplementary Table 1:** Average Fe(II)/Fe(III) ratio of the precipitate from 7 day old cultures of *Pseudanabaena* PCC7367 after the addition of Fe(II) to a concentration of 600  $\mu\text{M}$  as determined by ferrozine assays. Cultures were grown in an open-culture system with 0.2%  $\text{CO}_2$  or in a closed-culture system with either 0.2% or 10%  $\text{CO}_2$ . Data are presented as mean values  $\pm$  SD with  $n = 3$  biologically independent samples.

| $\text{CO}_2$ conc. [%] | Culture system | Fe(II)/Fe(III) ratio |
|-------------------------|----------------|----------------------|
| 0.2                     | open           | $2.38 \pm 0.15$      |
| 0.2                     | closed         | $2.23 \pm 0.07$      |
| 10                      | closed         | $2.76 \pm 0.24$      |

**Supplementary Table 2:** Average Chl *a* concentration of 15 day old cultures of *Synechococcus* PCC7336 grown in ASNIII Media buffered at pH 6.8 and pH 7.2 and unbuffered at  $\sim$  pH 7.4. Data are presented as mean values  $\pm$  SD with  $n = 3$  biologically independent samples.

| Media              | pH  | Chl <i>a</i>    |
|--------------------|-----|-----------------|
| ASNIII, unbuffered | 7.4 | $1.42 \pm 0.06$ |
| ASNIII, buffered   | 6.8 | $1.38 \pm 0.04$ |
| ASNIII, buffered   | 7.2 | $1.7 \pm 0.28$  |

**Supplementary Table 3:** Gene screen results for *Pseudanabaena* sp. PCC7367 and *Synechococcus* PCC7336. The genomic sequences of both organisms, GCA\_000317065.1 and GCA\_000332275.1 respectively, were screened for the presence of a *PxcA* encoding gene. Shown is the best hit, as indicated by nBlast or PsiBlast. The presence or absence of the gene is indicated by a '+' or '-' for each organism.

| Organism                                         | nBlast                            | Cover | E-Value  | PsiBlast       | Cover | E-Value  | Present |
|--------------------------------------------------|-----------------------------------|-------|----------|----------------|-------|----------|---------|
| <i>Synechocystis</i> sp. PCC 6803 reference gene | 14615844                          | -     | -        | BAA16993.1     | -     | -        |         |
| <i>Pseudanabaena</i> sp. PCC7367                 | CP003592.1<br>233432 to<br>233646 | 18%   | 4.00E-08 | WP_015163468.1 | 97%   | 2.00E-65 | +       |
| <i>Synechococcus</i> sp. PCC7336                 | AF448078                          | 7%    | 2.8      | WP_162139143.1 | 13%   | 0.46     | -       |

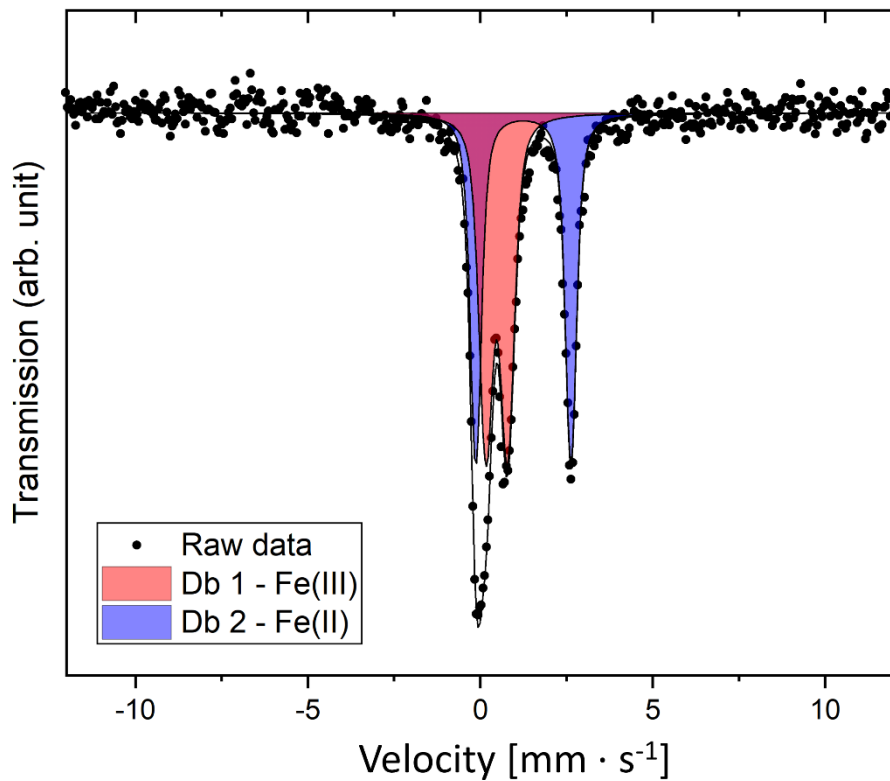

**Supplementary Fig. 2:** Transmission  $^{57}\text{Fe}$  Mössbauer spectra measurement at 77 K of the green precipitate which formed in cultures with  $600\ \mu\text{M}$  Fe(II) in the open-culture system.

**Supplementary Table 4:** Mössbauer hyperfine parameters measured at 77 K of the spectra presented in **Supplementary Fig. 2**. Db – spectral doublet; Ox. State – oxidation state; CS – center shift; QS – quadrupole splitting; R.A. – relative abundance.

| Site | Ox. State | CS (mm/s) | QS (mm/s) | stdev [QS] (mm/s) | skew [QS] (mm/s) | R.A. (%) | Error [R.A.] (%) |
|------|-----------|-----------|-----------|-------------------|------------------|----------|------------------|
| Db 1 | Fe(III)   | 0.47      | 0.63      | 0.28              | 0.13             | 52.5     | 1.1              |
| Db 2 | Fe(II)    | 1.25      | 2.76      | 0.18              | 0.00             | 47.5     | 1.1              |

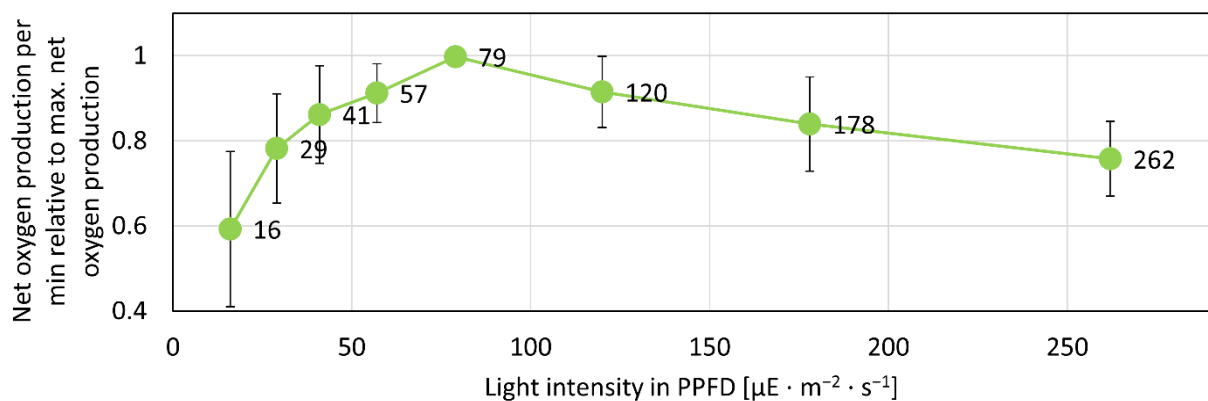

**Supplementary Fig. 3:** Oxygen production per min at different light intensities of exponentially growing *Pseudanabaena* sp. PCC7367 under anaerobic conditions relative to the maximum measured oxygen production value. Data are presented as mean values  $\pm$  SD with  $n = 4$  biologically independent samples.

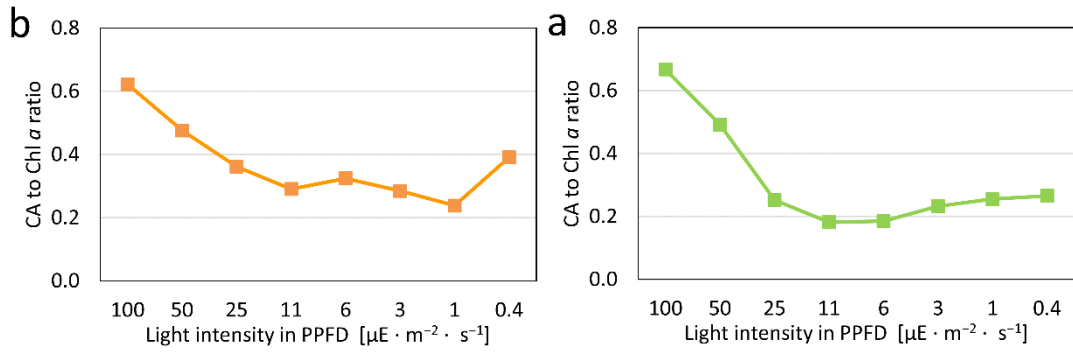

**Supplementary Fig. 4:** Pigment content determinations to determine optimal growth light intensity. Plots of the carotenoid (CA) to chlorophyll a (Chl a) ratios of cultures of *Pseudanabaena* sp. PCC7367 (a) and *Synechococcus* PCC7336 (b) grown under different light intensities for 14 days. n = 1

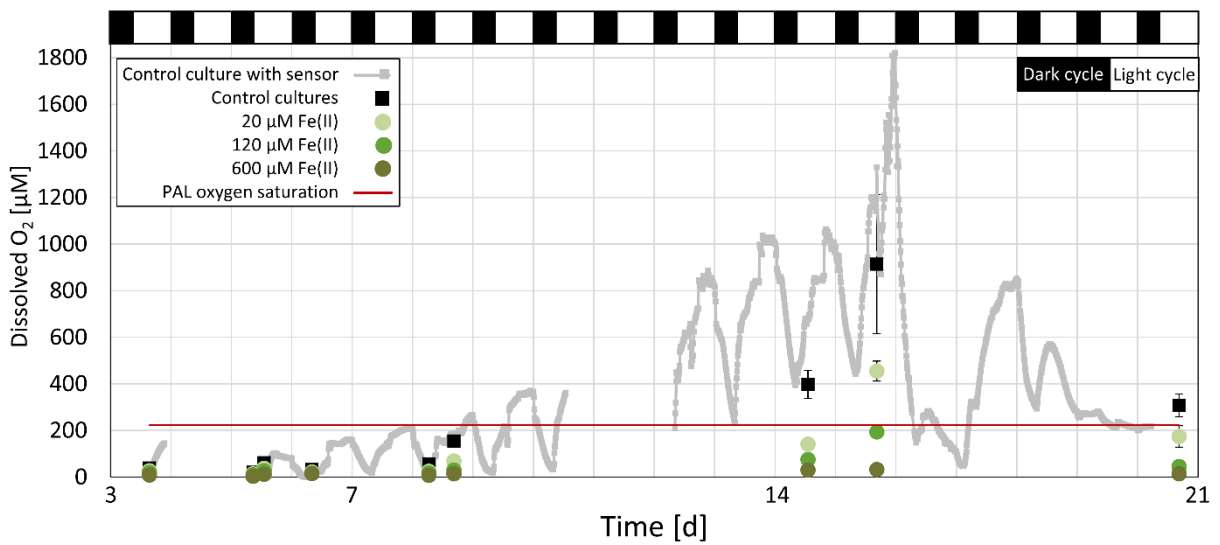

**Supplementary Fig. 5:** Oxygen accumulation in a closed system of *Pseudanabaena* sp. PCC7367 over the course of 21 days. During the closed culture system experiments, the dissolved oxygen levels of the culture media was assessed during different growth phases. Depicted are the mean value and standard deviation for n = 4 biologically independent samples at different starting Fe(II) concentrations (black = control; light green = 20  $\mu\text{M}$ ; green = 120  $\mu\text{M}$ ; dark green = 600  $\mu\text{M}$ ), as well as the dissolved oxygen levels of one control culture with a permanently inserted oxygen sensor (grey line) of *Pseudanabaena* sp. PCC7367. The red line indicates the oxygen saturation level under present day atmospheric conditions (PAL). The measurements at day five were used to calculate the oxygen production rates per mg Chl a per hour for the closed system (**Error! Reference source not found.**). Data for the reference culture from day 4-5 and 10-12 were not recorded because of a hardware malfunction.
